# Supplementary material for: The Combination of Phages and Faecal Microbiota Transplantation Can Effectively Treat Mouse Colitis Caused by Salmonella enterica Serovar Typhimurium
Source: PubMed Central journal article supplement (PMC9301289; doi:10.3389/fmicb.2022.944495), 2022-07-07
Supplement: Data_Sheet_1.pdf [file Data_Sheet_1.pdf]

## Supplementary Material

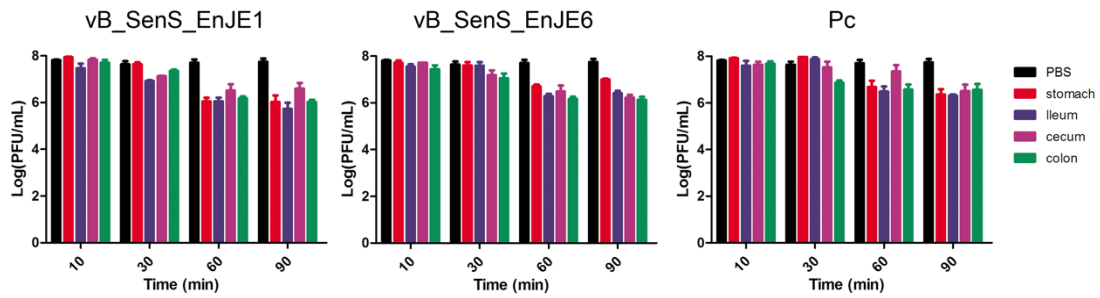

**Figure S1. The stability of a single phage and Pc in gastrointestinal conditions.** The stability of the phages were measured at 10 min, 30 min, 60 min and 90 min after 1:1 (v/v) coincubation of the phages and contents collected from the stomach, ileum, caecum, and colon of healthy mice at 37 °C. All experiments were repeated three times. Data are the means  $\pm$  SEM, n = 6. \*,  $P < 0.05$ ; \*\*,  $P < 0.01$ ; \*\*\*,  $P < 0.001$  indicate a significant difference.

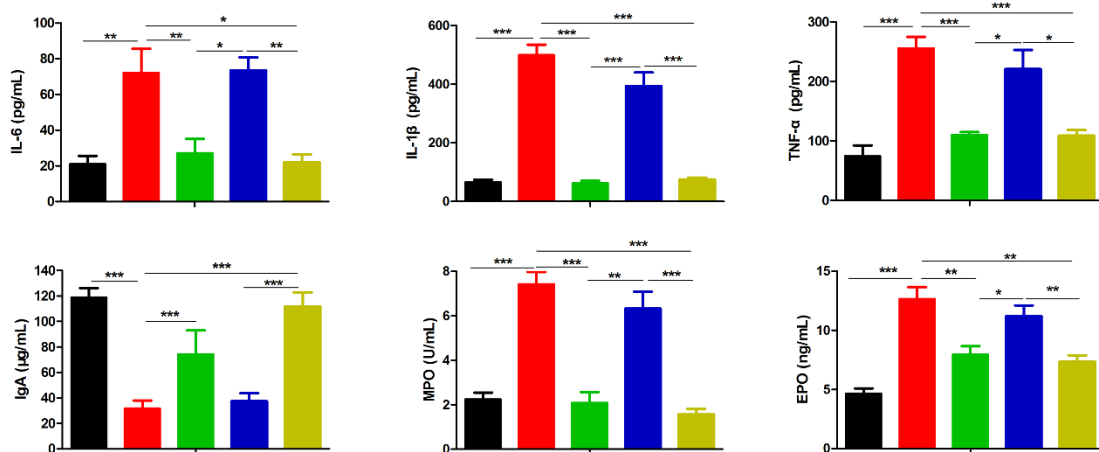

**Figure S2. Inflammatory cytokine expression in the colonic tissues.** The levels of IL-6, IL-1 $\beta$ , TNF- $\alpha$ , the MPO and EPO in colonic tissues and the IgA in blood were measured. Mice were orally administered with a single dose of Pc (0.2 mL,  $2 \times 10^8$

PFU/mouse) at 3 h after *S. typhimurium* 01E infection) by gavage or with FMT (0.2 mL/mouse) at 6, 12, 24 and 36 h after *S. typhimurium* 01E infection. Healthy mice were used as controls. Data are expressed as the means  $\pm$  SEM, n = 6. \*,  $P < 0.05$ ; \*\*,  $P < 0.01$ ; \*\*\*,  $P < 0.001$ .

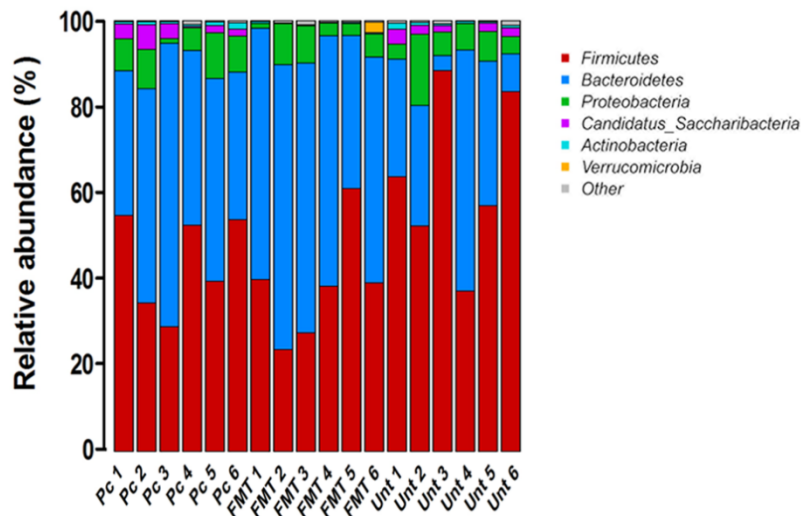

**Figure S3. Single dose Pc or single FMT treatment has no side effect on intestinal microbiota of healthy mice.** Relative abundance of predominant genera in faeces. Mice were orally administered with a single dose of Pc (0.2 mL,  $2 \times 10^8$  PFU/mouse) or with FMT (0.2 mL/mouse) at different time intervals. The microbiota of fresh faeces collected from healthy, single-dose Pc-treated and FMT-treated mice were detected by amplifying the V3-V4 region of the 16S rRNA gene using specific primers (Nobar\_341F-805R).

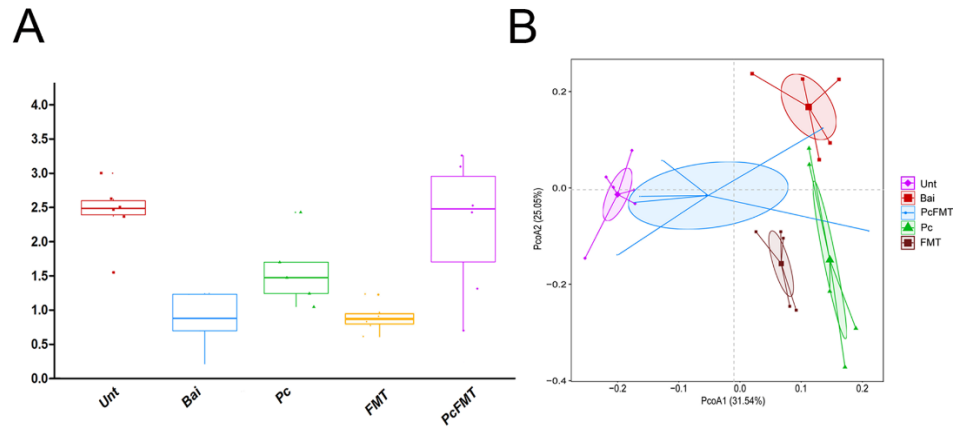

**Figure S4. PcFMT recovered the microbiota community structures of *S. Typhimurium*-induced colitis mice.** The microbiota of fresh faeces collected from mice of all treatment groups were detected by amplifying the V3-V4 region of the 16S rRNA gene using specific primers (Nobar\_341F-805R). (A) Alpha diversity was measured by the Shannon index. (B) PCoA plot of the faecal microbiota was estimated based on an unweighted UniFrac metric. “Unt” represents untreated healthy mice group; “Bai” represents the bacterial-infected mice group; “Pc” means phage cocktail-treated mice group; “PcFMT” represents the combined phage cocktail and FMT mice group.

**Table S1. The host range of vB\_SenS-EnJE1 and vB\_SenS-EnJE6.**

| Bacterial strain                                     | EOP  |      | Double-layer agar |      | Bacterial strain                                     | EOP  |      | Double-layer agar |      |
|------------------------------------------------------|------|------|-------------------|------|------------------------------------------------------|------|------|-------------------|------|
|                                                      |      |      | method            |      |                                                      |      |      | method            |      |
|                                                      | 01E1 | 01E6 | 01E1              | 01E6 |                                                      | 01E1 | 01E6 | 01E1              | 01E6 |
| <i>S. Typhimurium</i> 01E <sup>1</sup>               | 2.15 | 2.21 | ++                | ++   | <i>S. Abortusequi</i> DE1 <sup>4</sup>               | 1.22 | 1.42 | ++                | ++   |
| <i>S. Typhimurium</i> ATCC14028 <sup>2</sup>         | 1.59 | 1.47 | ++                | ++   | <i>S. Abortusequi</i> DE2 <sup>4</sup>               | 1.05 | 0.97 | ++                | ++   |
| <i>S. Typhimurium</i> 181001 <sup>3</sup>            | 1.29 | 1.41 | ++                | ++   | <i>S. Abortusequi</i> DE3 <sup>4</sup>               | 1.12 | 0.48 | ++                | +    |
| <i>S. Typhimurium</i> 181002 <sup>3</sup>            | 1.81 | 2.05 | ++                | ++   | <i>S. Abortusequi</i> DE4 <sup>4</sup>               | 0.89 | 0.95 | ++                | ++   |
| <i>S. Typhimurium</i> 181003 <sup>3</sup>            | -    | 2.41 | -                 | ++   | <i>S. Abortusequi</i> DE5 <sup>4</sup>               | 0.95 | 1.07 | +                 | +    |
| <i>S. Typhimurium</i> 181004 <sup>3</sup>            | -    | 2.53 | -                 | ++   | <i>S. Abortusequi</i> DE6 <sup>4</sup>               | 1.05 | 0.91 | ++                | ++   |
| <i>S. Typhimurium</i> 181005 <sup>3</sup>            | 1.89 | 1.76 | ++                | ++   | <i>S. Abortusequi</i> DE7 <sup>4</sup>               | 0.75 | 0.87 | ++                | ++   |
| <i>S. Typhimurium</i> 181006 <sup>3</sup>            | 1.59 | 1.71 | ++                | ++   | <i>S. Abortusequi</i> GT1 <sup>4</sup>               | 1.65 | 1.42 | ++                | ++   |
| <i>S. Typhimurium</i> 181007 <sup>3</sup>            | -    | -    | -                 | ++   | <i>S. Abortusequi</i> GT2 <sup>4</sup>               | 1.01 | 1    | ++                | ++   |
| <i>S. Typhimurium</i> 181008 <sup>3</sup>            | 0.59 | 1.15 | +                 | ++   | <i>S. Abortusequi</i> 0078 <sup>4</sup>              | 0.42 | 0.91 | +                 | ++   |
| <i>S. Typhimurium</i> 181009 <sup>3</sup>            | 1.84 | 1.97 | ++                | ++   | <i>S. Abortusequi</i> 078H <sup>4</sup>              | 0.98 | 1.17 | ++                | ++   |
| <i>S. Typhimurium</i> 181011 <sup>3</sup>            | 1.03 | 2.58 | +                 | ++   | <i>S. Abortusequi</i> 0514 <sup>4</sup>              | 1.4  | 1.7  | ++                | ++   |
| <i>S. Typhimurium</i> 181012 <sup>3</sup>            | 1.25 | 1.48 | ++                | ++   | <i>S. Abortusequi</i> 202035 <sup>4</sup>            | 1.2  | 0.58 | ++                | +    |
| <i>S. Typhimurium</i> 181013 <sup>3</sup>            | 1.51 | 1.76 | ++                | ++   | <i>S. Abortusequi</i> 23EE <sup>4</sup>              | 0.9  | 0.95 | ++                | ++   |
| <i>S. Typhimurium</i> 181014 <sup>3</sup>            | 1.75 | 1.42 | ++                | ++   | <i>S. Abortusequi</i> 01D3 <sup>4</sup>              | 0.34 | 0.78 | +                 | ++   |
| <i>S. Typhimurium</i> 181015 <sup>3</sup>            | 1.38 | 1.58 | ++                | ++   | <i>S. Dublin</i> SD <sup>1</sup>                     | -    | 1.1  | -                 | ++   |
| <i>S. Typhimurium</i> 181016 <sup>3</sup>            | 1.17 | 1.65 | ++                | ++   | <i>S. Pullorum</i> SP <sup>1</sup>                   | -    | -    | -                 | -    |
| <i>S. Typhimurium</i> 181017 <sup>3</sup>            | 0.85 | 2.14 | +                 | ++   | <i>S. Pullorum</i> S06004 (Li <i>et al.</i> , 2015)  | -    | -    | -                 | -    |
| <i>S. Typhimurium</i> 181018 <sup>3</sup>            | 0.97 | 1.91 | ++                | ++   | <i>S. Abortusequi</i> ATCC9842 <sup>2</sup>          | -    | -    | -                 | -    |
| <i>S. Typhimurium</i> 181019 <sup>3</sup>            | 1.51 | 1.49 | ++                | ++   | <i>S. Enteritidis</i> ATCC13076 <sup>2</sup>         | 0.8  | 0.9  | ++                | ++   |
| <i>S. Typhimurium</i> LH430 <sup>1</sup>             | -    | -    | -                 | -    | <i>S. Livingstone</i> 00750 <sup>1</sup>             | -    | -    | -                 | -    |
| <i>S. Typhimurium</i> 1344 (Hu <i>et al.</i> , 2017) | -    | -    | -                 | -    | <i>S. Livingstone</i> 00751 <sup>1</sup>             | -    | -    | -                 | -    |
| <i>S. Typhimurium</i> 20210101 <sup>1</sup>          | 2.13 | 2.34 | ++                | ++   | <i>S. Livingstone</i> 00752 <sup>1</sup>             | -    | -    | -                 | -    |
| <i>S. Typhimurium</i> 202012 <sup>1</sup>            | 1.91 | 2.01 | ++                | ++   | <i>Salmonella</i> 1021 <sup>1</sup>                  | -    | -    | -                 | -    |
| <i>S. Abortusequi</i> wudi1 <sup>4</sup>             | 1.79 | 2.13 | ++                | ++   | <i>E. coli</i> 011D <sup>4</sup>                     | -    | -    | -                 | -    |
| <i>S. Abortusequi</i> wudi2 <sup>4</sup>             | 0.97 | 2.51 | +                 | ++   | <i>E. coli</i> E1 <sup>1</sup>                       | -    | -    | -                 | -    |
| <i>S. Abortusequi</i> Yuch1 <sup>4</sup>             | 1.54 | 0.98 | ++                | +    | <i>E. coli</i> E4 <sup>5</sup>                       | -    | -    | -                 | -    |
| <i>S. Abortusequi</i> Yuch2 <sup>4</sup>             | 2.11 | 2.09 | ++                | ++   | <i>K. pneumoniae</i> K7 (Cai <i>et al.</i> , 2018)   | -    | -    | -                 | -    |
| <i>S. Abortusequi</i> Yuch3 <sup>4</sup>             | 1.45 | 0.67 | ++                | +    | <i>S. aureus</i> N38 (Gu <i>et al.</i> , 2010)       | -    | -    | -                 | -    |
| <i>S. Abortusequi</i> Yuch4 <sup>4</sup>             | 21.9 | 2.39 | ++                | ++   | <i>E. faecalis</i> GF29 (Cheng <i>et al.</i> , 2017) | -    | -    | -                 | -    |

<sup>1</sup> laboratory preserved strains; <sup>2</sup> purchased strains from the China Center of Industrial Culture Collection; <sup>3</sup> were kindly provided by Yuqing Liu (Shandong Academy of Agricultural Sciences, Jinan, China) (strains were isolated from Jinan Chicken Farms); <sup>4</sup> were kindly provided by Jianbao Dong (Liaocheng University, Liaocheng, China) (strains were isolated from Shandong Donkey Farms); <sup>5</sup> were kindly provided by the First Hospital of Jilin Province. (++) indicates transparent plaques were observed; (+) indicates blurred plaques were observed; (-) indicates no plaque was observed.

**Table S2. The primers used for the RT–PCR analysis in this study.**

| <b>Genes</b>   | <b>Primer sequence (5' to 3')</b>                              |
|----------------|----------------------------------------------------------------|
| <i>SMCT1</i>   | F: TGCCATTCCTTATGGGTAGG<br>R: AGTGGAGTCCTTCCGCATTA             |
| <i>MCT1</i>    | F: GTGCAGCA-GCCAAGGAGCCC<br>R: CCATGGCCAGTCCGTTGGCC            |
| <i>GPR43</i>   | F: CTGTATGGAGTGATGATCGCTGCTCTG<br>R: CTGCTCTTGGGTGAAGTTCTCGTAG |
| <i>HDAC</i>    | F: CACACAGCAGACTTTCTACCAGGAC<br>R: GACATTGAAGCCCTCGCCACTG      |
| <i>Mucin 1</i> | F: CCTTCAGTGCCAAGTCAATAC<br>R: TCCCCAGAAAATCTCCGTT             |
| <i>Mucin 2</i> | F: ATGCCACCTCCTCAAAGAC<br>R: GTAGTTTCCGTTGGAACAGTGAA           |
| <i>β-actin</i> | F: CAGCTGAGAGGGAAAATCGTG<br>R: CTCCAGGGAGGAAGAGGATG            |
| <i>GAPDH</i>   | F: CCATGGAGAAGGCTGGGG<br>R: CAAAGTTGTCATGGATGACC               |

**Table S3. General features of the putative ORFs of vB\_SenS-EnJE1 with the best matches in the database.**

| ORFa  | Bp    |       | Amio acid | Protein size (kDa) | pI    | Annotated function                   | Representative similarity to proteins in database | E value | Identity (positives) | Query cover | Accession no.  |
|-------|-------|-------|-----------|--------------------|-------|--------------------------------------|---------------------------------------------------|---------|----------------------|-------------|----------------|
|       | Start | Stop  |           |                    |       |                                      |                                                   |         |                      |             |                |
| 1† -  | 102   | 458   | 118       | 12.517             | 9.85  | hypothetical protein                 | [ <i>Salmonella</i> phage BPS11Q3]                | 3e-79   | 100%                 | 100%        | YP_009322827.1 |
| 2‡ -  | 568   | 858   | 96        | 10.648             | 9.98  | putative class I holin               | [ <i>Salmonella</i> phage SETP13]                 | 1e-61   | 96.88%               | 100%        | YP_008767059.1 |
| 3§ -  | 860   | 1141  | 93        | 10.260             | 7.85  | putative holin                       | [ <i>Salmonella</i> phage Jersey]                 | 5e-59   | 94.62%               | 100%        | YP_008239771.1 |
| 4† -  | 1220  | 1654  | 144       | 15.574             | 4.95  | hypothetical protein                 | [ <i>Salmonella</i> phage LPSE1]                  | 4e-101  | 100%                 | 100%        | APU02983.1     |
| 5† -  | 1660  | 2031  | 123       | 14.144             | 10.46 | hypothetical protein                 | [ <i>Salmonella</i> enterica]                     | 2e-84   | 99.19%               | 99%         | WP_129416900.1 |
| 6‡ -  | 2034  | 2210  | 58        | 6.329              | 7.04  | hypothetical protein                 | [ <i>Salmonella</i> phage SE2]                    | 4e-35   | 100%                 | 100%        | YP_005098114.1 |
| 7† -  | 2234  | 2743  | 169       | 19.412             | 5.13  | hypothetical protein                 | [ <i>Salmonella</i> phage BPS11Q3]                | 2e-99   | 86.47%               | 100%        | YP_009322833.1 |
| 8† -  | 2913  | 3077  | 54        | 6.376              | 11.82 | hypothetical protein                 | [ <i>Salmonella</i> phage wksl3]                  | 7e-30   | 98.15%               | 100%        | AFO12358.1     |
| 9† -  | 3198  | 3368  | 56        | 5.699              | 9.74  | No significant similarity found      |                                                   |         |                      |             |                |
| 10‡ + | 4011  | 4241  | 76        | 8.877              | 8.00  | DNA-binding protein                  | [ <i>Salmonella</i> phage BPS11T2]                | 1e-34   | 95.08%               | 80%         | AUM59064.1     |
| 11† + | 4528  | 6714  | 728       | 80.411             | 4.88  | primase/helicase                     | [ <i>Salmonella</i> phage vB_SenS_phi135]         | 0.0     | 99.18%               | 100%        | AYP69663.1     |
| 12‡ - | 6728  | 6946  | 72        | 7.920              | 8.57  | XRE family transcriptional regulator | [ <i>Salmonella</i> enterica]                     | 1e-45   | 100%                 | 100%        | WP_015984911.1 |
| 13† + | 7080  | 7592  | 170       | 19.288             | 4.50  | hypothetical protein                 | [ <i>Salmonella</i> phage SETP7]                  | 2e-97   | 90.59%               | 100%        | YP_008767212.1 |
| 14† + | 7634  | 8875  | 413       | 46.036             | 7.30  | DUF2800 domain-containing protein    | [ <i>Salmonella</i> enterica]                     | 0.0     | 93.46%               | 100%        | EAA8503712.1   |
| 15† + | 9135  | 9764  | 209       | 23.630             | 4.76  | DNA polymerase                       | [ <i>Salmonella</i> phage BPS11Q3]                | 2e-149  | 98.56%               | 100%        | YP_009322844.1 |
| 16† + | 9822  | 12920 | 1032      | 115.874            | 7.63  | DNA polymerase I                     | [ <i>Salmonella</i> phage vB_SpuS_Sp4]            | 0.0     | 95.93%               | 100%        | AWY03025.1     |
| 17† + | 13007 | 13294 | 95        | 10.880             | 9.63  | putative restriction endonuclease    | [ <i>Salmonella</i> phage LPSE1]                  | 1e-61   | 96.84%               | 100%        | APU03027.1     |
| 18† + | 13326 | 13517 | 63        | 7.038              | 9.72  | hypothetical protein                 | [ <i>Salmonella</i> phage LPSE1]                  | 2e-35   | 96.83%               | 100%        | APU03026.1     |
| 19† + | 13519 | 14016 | 165       | 18.829             | 9.85  | hypothetical protein                 | [ <i>Salmonella</i> phage STP03]                  | 3e-115  | 96.97%               | 100%        | APM00325.1     |
| 20† + | 14049 | 16478 | 809       | 90.800             | 8.01  | putative helicase                    | [ <i>Salmonella</i> phage wksl3]                  | 0.0     | 97.78%               | 100%        | AFO12372.1     |
| 21† + | 16553 | 16696 | 47        | 5.760              | 6.67  | hypothetical protein                 | [ <i>Salmonella</i> phage SETP13]                 | 5e-22   | 100%                 | 100%        | YP_008767032.1 |
| 22† - | 16815 | 18869 | 684       | 72.931             | 5.06  | tail spike protein                   | [ <i>S Salmonella</i> virus VSt10]                | 0.0     | 98.39%               | 100%        | AXQ70291.1     |
| 23‡ - | 18882 | 21440 | 852       | 93.910             | 5.16  | tail fiber protein                   | [ <i>Salmonella</i> phage vB_SpuS_Sp4]            | 0.0     | 99.30%               | 100%        | AWY03031.1     |
| 24† - | 21793 | 22245 | 150       | 16.905             | 4.21  | DUF1833 domain-containing protein    | [ <i>Salmonella</i> enterica]                     | 8e-106  | 99.33%               | 100%        | WP_015976748.1 |
| 25† - | 22305 | 22805 | 166       | 18.638             | 4.72  | hypothetical protein                 | [ <i>Salmonella</i> phage SETP13]                 | 1e-121  | 100%                 | 100%        | YP_008767027.1 |
| 26† - | 22807 | 25140 | 777       | 82.970             | 4.66  | putative tape measure protein        | [ <i>Salmonella</i> phage LPSE1]                  | 0.0     | 98.71%               | 100%        | APU03018.1     |

|       |       |       |     |        |       |                                              |                                                |        |        |      |                |
|-------|-------|-------|-----|--------|-------|----------------------------------------------|------------------------------------------------|--------|--------|------|----------------|
| 27† - | 25498 | 25914 | 138 | 15.849 | 5.24  | tail assembly<br>chaperone                   | [ <i>Salmonella</i> phage vB_Sens_PVP-<br>SE2] | 3e-95  | 98.55% | 100% | AST15484.1     |
| 28†+  | 26084 | 26263 | 59  | 6.603  | 9.63  | superinfection<br>immunity protein           | [ <i>Salmonella enterica</i> ]                 | 2e-32  | 100%   | 100% | WP_015984947.1 |
| 29† + | 26326 | 27456 | 376 | 42.485 | 8.82  | oxidoreductase                               | [ <i>Salmonella enterica</i> ]                 | 0.0    | 99.47% | 100% | WP_064624764.1 |
| 30†+  | 27477 | 27683 | 68  | 7.681  | 5.09  | hypothetical protein                         | [ <i>Salmonella enterica</i> ]                 | 2e-42  | 100%   | 100% | WP_015984945.1 |
| 31† + | 27797 | 28468 | 223 | 25.665 | 7.30  | putative DNA-binding<br>protein              | [ <i>Salmonella enterica</i> ]                 | 1e-16  | 98.65% | 100% | WP_016062375.1 |
| 32† - | 28497 | 29639 | 380 | 40.213 | 4.35  | putative tail protein                        | [ <i>Salmonella</i> phage wksl3]               | 0.0    | 98.42% | 100% | AFO12387.1     |
| 33† - | 29666 | 29947 | 93  | 10.113 | 5.11  | phage tail protein                           | [ <i>Salmonella</i> phage FSL SP-101]          | 7e-59  | 94.62% | 100% | AGF87719.1     |
| 34§ - | 30085 | 30450 | 121 | 13.321 | 9.77  | tail protein                                 | [ <i>Salmonella</i> phage BPS11Q3]             | 5e-84  | 100%   | 100% | YP_009322866.1 |
| 35† - | 30477 | 30812 | 111 | 12.176 | 8.37  | tail protein                                 | [ <i>Salmonella</i> phage BPS11Q3]             | 1e-73  | 100%   | 100% | YP_009322867.1 |
| 36† - | 30836 | 31441 | 201 | 20.566 | 8.45  | neck protein                                 | [ <i>Salmonella</i> phage BPS11Q3]             | 2e-140 | 100%   | 100% | YP_009322868.1 |
| 37† - | 31444 | 31953 | 169 | 17.778 | 4.60  | head-tail joining<br>protein                 | [ <i>Salmonella</i> phage BPS11Q3]             | 9e-118 | 98.22% | 100% | YP_009322869.1 |
| 38† - | 31957 | 32145 | 62  | 7.167  | 4.85  | head-tail joining<br>protein                 | [ <i>Salmonella</i> phage STP03]               | 4e-35  | 96.77% | 100% | APM00274.1     |
| 39† - | 32182 | 32532 | 116 | 12.244 | 4.02  | neck whiskers protein                        | [ <i>Salmonella</i> phage STP03]               | 5e-75  | 98.28% | 100% | APM00275.1     |
| 40† - | 32544 | 32828 | 94  | 9.325  | 9.79  | head-tail joining<br>protein                 | [ <i>Salmonella</i> phage BPS11Q3]             | 4e-57  | 100%   | 100% | YP_009322872.1 |
| 41† - | 32889 | 33938 | 349 | 37.856 | 4.61  | coat protein                                 | [ <i>Salmonella</i> phage BPS11T2]             | 0.0    | 99.14% | 100% | AUM59037.1     |
| 42† - | 33942 | 34643 | 233 | 25.692 | 6.13  | putative scaffold<br>protein                 | [ <i>Salmonella</i> phage SETP3]               | 2e-162 | 97.85% | 94%  | YP_001110836.1 |
| 43† - | 34837 | 35223 | 128 | 14.164 | 9.47  | o-spanin                                     | [ <i>Salmonella</i> phage vB_Sens_PVP-<br>SE2] | 5e-83  | 94.53% | 100% | AST15489.1     |
| 44† - | 35541 | 35999 | 152 | 16.393 | 4.43  | neck whiskers protein                        | [ <i>Salmonella</i> phage vB_SpuS_Sp4]         | 8e-101 | 99.34% | 100% | AWY02990.1     |
| 45† - | 36002 | 37075 | 357 | 40.094 | 6.79  | head morphogenesis<br>protein                | [ <i>Salmonella</i> phage FSL SP-101]          | 0.0    | 94.60% | 98%  | AGF87707.1     |
| 46† + | 37211 | 37861 | 216 | 24.982 | 5.75  | amidase                                      | [ <i>Salmonella</i> phage SE2]                 | 2e-153 | 94.44% | 100% | YP_005098129.1 |
| 47† - | 37892 | 39364 | 490 | 53.813 | 4.68  | 62kDa structural<br>protein                  | [ <i>Salmonella</i> phage S119]                | 0.0    | 99.18% | 100% | AXC41123.1     |
| 48† - | 39377 | 40516 | 379 | 43.019 | 6.27  | putative phage<br>terminase large<br>subunit | [ <i>Salmonella</i> phage SETP7]               | 0.0    | 99.47% | 100% | YP_008767173.1 |
| 49† - | 40638 | 41183 | 181 | 20.479 | 6.27  | putative terminase<br>small subunit          | [ <i>Salmonella</i> phage SETP3]               | 2e-130 | 99.45% | 100% | YP_001110829.1 |
| 50† - | 41365 | 41547 | 60  | 6.858  | 8.68  | hypothetical protein                         | [ <i>Salmonella</i> phage SE2]                 | 2e-34  | 100%   | 100% | YP_005098124.1 |
| 51† - | 41846 | 41992 | 48  | 5.752  | 10.04 | putative NinH-like<br>protein                | [ <i>Salmonella</i> phage Ent1]                | 1e-26  | 97.92% | 100% | YP_007010509.1 |
| 52† - | 42067 | 42177 | 36  | 4.284  | 4.12  | hypothetical protein                         | [ <i>Salmonella</i> phage vB_SpuS_Sp4]         | 3e-13  | 94.44% | 100% | AWY03000.1     |

|       |       |       |    |       |      |                               |                                  |       |        |      |                |
|-------|-------|-------|----|-------|------|-------------------------------|----------------------------------|-------|--------|------|----------------|
| 53† - | 42213 | 42395 | 60 | 7.119 | 6.35 | putative NinZ-like<br>protein | [ <i>Salmonella</i> phage SETP3] | 4e-34 | 96.67% | 100% | YP_001110826.1 |
| 54† - | 42544 | 42729 | 61 | 6.880 | 7.08 | hypothetical protein          | [ <i>Salmonella</i> phage SE2]   | 8e-38 | 100%   | 100% | YP_005098119.1 |

<sup>a</sup> †, AUG start codons; ‡, UUG start codons; §, GUG start codons. +, right orientation; -, left orientation.



**Table S4. General features of the putative ORFs of vB\_SenS-EnJE6 with the best matches in the database.**

| ORF <sup>a</sup> | Bp    |       | Amino acid | Protein size (kDa) | pI    | Annotated function                         | Representative similarity to proteins in database | E value | Identity (positives) | Query cover | Accession no.  |
|------------------|-------|-------|------------|--------------------|-------|--------------------------------------------|---------------------------------------------------|---------|----------------------|-------------|----------------|
|                  | Start | Stop  |            |                    |       |                                            |                                                   |         |                      |             |                |
| 1† -             | 2     | 277   | 92         | 10.287             | 10.23 | hypothetical protein                       | [ <i>Salmonella enterica</i> ]                    | 1e-60   | 100%                 | 100%        | WP_129416900.1 |
| 2† -             | 280   | 483   | 67         | 7.406              | 7.04  | hypothetical protein                       | [ <i>Salmonella</i> phage SE2]                    | 1e-42   | 100%                 | 100%        | YP_005098114.1 |
| 3† -             | 480   | 995   | 171        | 19.628             | 6.11  | hypothetical protein                       | [ <i>Salmonella</i> phage vB_SpuS_Sp4]            | 1e-106  | 88.69%               | 98%         | AWY03012.1     |
| 4† -             | 988   | 1101  | 37         | 4.319              | 3.35  | hypothetical protein                       | [ <i>Salmonella</i> phage BPS11Q3]                | 8e-19   | 100%                 | 100%        | YP_009322834.1 |
| 5† -             | 1571  | 1672  | 33         | 3.866              | 9.84  | DUF551 domain-containing protein           | [ <i>Salmonella enterica</i> ]                    | 3e-12   | 87.88%               | 100%        | WP_078055194.1 |
| 6† -             | 1669  | 1944  | 91         | 11.030             | 8.66  | ASCH domain-containing protein             | [ <i>Salmonella enterica</i> ]                    | 6e-58   | 94.51%               | 100%        | WP_000002128.1 |
| 7† -             | 1960  | 2163  | 67         | 7.575              | 9.75  | hypothetical protein                       | [ <i>Salmonella</i> phage vB_SpuS_Sp4]            | 4e-42   | 100%                 | 100%        | AWY03016.1     |
| 8† +             | 2621  | 2791  | 56         | 6.636              | 10    | DNA-binding protein                        | [ <i>Salmonella</i> phage BPS11T2]                | 3e-33   | 100%                 | 100%        | AUM59064.1     |
| 9† +             | 2788  | 3021  | 77         | 8.641              | 9.49  | putative uvsX-like protein                 | [ <i>Salmonella</i> phage Ent1]                   | 8e-46   | 96.10%               | 100%        | YP_007010497.1 |
| 10† +            | 3078  | 5264  | 728        | 80.332             | 4.87  | hypothetical protein                       | [ <i>Salmonella</i> phage vB_SenS_phi135]         | 0.0     | 99.18%               | 100%        | AYP69663.1     |
| 11† -            | 5279  | 5497  | 72         | 7.920              | 8.57  | XRE family transcriptional regulator       | [ <i>Salmonella enterica</i> ]                    | 1e-45   | 100%                 | 100%        | WP_015984911.1 |
| 12† +            | 5631  | 6143  | 170        | 19.245             | 4.45  | hypothetical protein                       | [ <i>Salmonella</i> phage SETP7]                  | 2e-98   | 91.18%               | 100%        | YP_008767212.1 |
| 13† +            | 6185  | 7426  | 413        | 46.006             | 7.30  | DUF2800 domain-containing protein          | [ <i>Salmonella enterica</i> ]                    | 0.0     | 93.70%               | 100%        | EAA8503712.1   |
| 14† +            | 7423  | 7596  | 57         | 6.771              | 9.69  | hypothetical protein                       | [ <i>Salmonella</i> phage vB_SpuS_Sp4]            | 5e-32   | 100%                 | 100%        | AWY03023.1     |
| 15† +            | 7686  | 8315  | 209        | 23.617             | 4.76  | DUF2815 family protein                     | [ <i>Salmonella enterica</i> ]                    | 2e-149  | 98.56%               | 98%         | WP_076915462.1 |
| 16† +            | 8373  | 11477 | 1034       | 116.196            | 7.53  | intein-containing DNA polymerase precursor | [ <i>Salmonella</i> phage BPS11Q3]                | 0.0     | 96.62%               | 100%        | YP_009322845.1 |
| 17† +            | 11564 | 11851 | 95         | 10.880             | 9.63  | hypothetical protein                       | [ <i>Salmonella</i> phage LPSE1]                  | 1e-61   | 96.84%               | 100%        | APU03027.1     |
| 18† +            | 11883 | 12074 | 63         | 7.098              | 8.54  | hypothetical protein                       | [ <i>Salmonella</i> phage vB_SpuS_Sp4]            | 2e-36   | 98.41%               | 100%        | AWY03027.1     |
| 19† +            | 12071 | 12574 | 167        | 18.916             | 9.66  | HNH endonuclease                           | [ <i>Salmonella</i> virus VSIP]                   | 4e-30   | 39.51%               | 97%         | AXQ70220.1     |
| 20† +            | 12567 | 13991 | 474        | 53.396             | 8.75  | putative helicase                          | [ <i>Escherichia</i> phage vB_EcoS-Ro145clw]      | 0.0     | 97.47%               | 100%        | AUX83700.1     |
| 21† +            | 13988 | 14209 | 73         | 8.722              | 4.75  | hypothetical protein                       | [ <i>Salmonella</i> phage SETP13]                 | 6e-42   | 100%                 | 100%        | YP_008767032.1 |
| 22† +            | 14206 | 14298 | 30         | 3.069              | 9.00  | hypothetical protein                       | [ <i>Salmonella</i> phage SG2]                    | 3e-23   | 100%                 | 100%        | ASZ76550.1     |
| 23† -            | 14328 | 16382 | 684        | 72.756             | 5.01  | tailspike protein                          | [ <i>Salmonella</i> phage L13]                    | 0.0     | 97.22%               | 100%        | YP_008058250.1 |
| 24† -            | 16395 | 18953 | 852        | 93.747             | 5.31  | tail fiber protein                         | [ <i>Salmonella</i> phage BPS11T2]                | 0.0     | 99.06%               | 100%        | AUM59079.1     |

|        |       |       |     |        |       |                                               |                                            |        |        |      |                |
|--------|-------|-------|-----|--------|-------|-----------------------------------------------|--------------------------------------------|--------|--------|------|----------------|
| 25† -  | 18944 | 19309 | 121 | 13.911 | 6.60  | hypothetical protein                          | [ <i>Salmonella</i> phage vB_SpuS_Sp4]     | 5e-86  | 99.17% | 100% | AWY03032.1     |
| 26§ -  | 19306 | 19821 | 171 | 19.197 | 4.29  | DUF1833 domain-containing protein             | [ <i>Salmonella enterica</i> ]             | 8e-122 | 98.83% | 100% | WP_015976748.1 |
| 27† -  | 19818 | 20318 | 166 | 18.652 | 4.76  | hypothetical protein                          | [ <i>Salmonella</i> phage SETP13]          | 3e-121 | 99.40% | 100% | YP_008767027.1 |
| 28† -  | 20320 | 22653 | 777 | 83.017 | 4.74  | tail tape measure protein                     | [ <i>Salmonella</i> virus VSt10]           | 0.0    | 97.68% | 100% | AXQ70286.1     |
| 29† -  | 22646 | 23005 | 119 | 13.581 | 4.55  | hypothetical protein                          | [ <i>Salmonella</i> phage SE2]             | 2e-83  | 100%   | 100% | YP_005098151.1 |
| 30† -  | 23011 | 23427 | 138 | 15.847 | 4.96  | tail assembly chaperone                       | [ <i>Salmonella</i> phage vB_SenS_PVP-SE2] | 6e-96  | 99.28% | 100% | AST15484.1     |
| 31†+   | 23597 | 23776 | 59  | 6.498  | 9.63  | superinfection immunity protein               | [ <i>Salmonella enterica</i> ]             | 2e-3   | 94.92% | 100% | WP_015984947.1 |
| 32†+   | 23839 | 24993 | 384 | 43.464 | 8.49  | putative serine/threonine protein phosphatase | [ <i>Salmonella</i> phage vB_SenS-Ent2]    | 0.0    | 97.41% | 100% | YP_009009947.1 |
| 33†+   | 25009 | 25509 | 166 | 19.285 | 9.93  | putative HNH endonuclease                     | [ <i>Salmonella</i> phage wksl3]           | 1e-118 | 100%   | 100% | AFO12384.1     |
| 34† +  | 25519 | 25749 | 76  | 8.690  | 6.33  | hypothetical protein                          | [ <i>Salmonella enterica</i> ]             | 7e-49  | 100%   | 100% | WP_015984945.1 |
| 35†+   | 25862 | 26533 | 223 | 25.665 | 7.30  | putative DNA-binding protein                  | [ <i>Salmonella enterica</i> ]             | 1e-161 | 98.65% | 100% | WP_016062375.1 |
| 36§ -  | 26562 | 27731 | 389 | 41.068 | 4.49  | hypothetical protein                          | [ <i>Salmonella</i> phage vB_SenS-Ent2]    | 0.0    | 97.69% | 100% | YP_009009943.1 |
| 37 ‡ - | 27731 | 28150 | 139 | 15.137 | 4.22  | phage tail protein                            | [ <i>Salmonella</i> phage FSL SP-101]      | 3e-88  | 90.65% | 100% | AGF87719.1     |
| 38† -  | 28150 | 28545 | 131 | 14.430 | 9.71  | HK97 gp10 family phage protein                | [ <i>Salmonella enterica</i> ]             | 1e-90  | 98.47% | 100% | WP_015984941.1 |
| 39† -  | 28542 | 28901 | 119 | 13.115 | 9.43  | tail protein                                  | [ <i>Salmonella</i> phage BPS11Q3]         | 1e-77  | 96.64% | 100% | YP_009322867.1 |
| 40† -  | 28901 | 29506 | 201 | 20.648 | 9.10  | Putative neck protein                         | [ <i>Salmonella</i> phage Ent1]            | 1e-136 | 98.01% | 94%  | YP_007010468.1 |
| 41† -  | 29509 | 30018 | 169 | 17.734 | 4.60  | putative head-tail joining protein            | [ <i>Salmonella</i> phage vB_SenS-Ent2]    | 5e-116 | 97.04% | 100% | YP_009009938.1 |
| 42† -  | 30022 | 30210 | 62  | 7.196  | 5.07  | putative head-tail joining protein            | [ <i>Salmonella</i> phage STP03]           | 2e-34  | 95.16% | 100% | APM00274.1     |
| 43† -  | 30247 | 30597 | 116 | 12.225 | 4.31  | neck whiskers protein                         | [ <i>Salmonella</i> phage S100]            | 2e-75  | 98.28% | 100% | AXC39494.1     |
| 44† -  | 30609 | 30896 | 95  | 9.425  | 9.54  | putative head protein                         | [ <i>Salmonella</i> phage SE2]             | 2e-58  | 100%   | 100% | YP_005098136.1 |
| 45† -  | 30957 | 32006 | 349 | 37.926 | 4.62  | putative major coat protein                   | [ <i>Salmonella</i> phage Ent1]            | 0.0    | 98.85% | 100% | YP_007010463.1 |
| 46† -  | 32010 | 32711 | 233 | 25.780 | 6.43  | scaffold protein                              | [ <i>Salmonella</i> virus VSt10]           | 1e-162 | 98.71% | 100% | AXQ70268.1     |
| 47† -  | 32796 | 32918 | 40  | 4.693  | 4.30  | scaffold protein                              | [ <i>Salmonella</i> phage Jersey]          | 4e-19  | 97.50% | 100% | YP_008239719.1 |
| 48† -  | 32905 | 33291 | 128 | 14.247 | 9.45  | o-spanin                                      | [ <i>Salmonella</i> phage vB_SenS_PVP-SE2] | 4e-77  | 89.06% | 100% | AST15489.1     |
| 49† -  | 33336 | 33455 | 39  | 4.653  | 10.98 | hypothetical protein                          | [ <i>Salmonella</i> phage ST3]             | 3e-20  | 100%   | 100% | ASZ77969.1     |
| 50† -  | 33609 | 34067 | 152 | 16.403 | 4.39  | putative head decoration protein              | [ <i>Salmonella</i> phage Ent1]            | 5e-100 | 98.03% | 100% | YP_007010459.1 |

|       |       |       |     |        |       |                                                      |                                            |             |        |      |                |
|-------|-------|-------|-----|--------|-------|------------------------------------------------------|--------------------------------------------|-------------|--------|------|----------------|
| 51‡ - | 34070 | 35113 | 347 | 38.811 | 5.47  | putative head morphogenesis protein, SPP1 gp7 family | [ <i>Salmonella</i> phage vB_SenS-Ent2]    | 0.0         | 96.54% | 100% | YP_009009929.1 |
| 52† + | 35279 | 35929 | 216 | 24.966 | 5.75  | amidase                                              | [ <i>Salmonella</i> phage SE2]             | 1e-153      | 94.91% | 100% | YP_005098129.1 |
| 53† - | 35960 | 37432 | 490 | 53.844 | 4.68  | DUF4055 domain-containing protein                    | [ <i>Salmonella</i> virus VSe103]          | 0.0         | 99.39% | 100% | AXQ70131.1     |
| 54† - | 37445 | 38716 | 423 | 47.568 | 6.35  | terminase large subunit                              | [ <i>Salmonella</i> phage vB_SenS_SB3]     | 0.0         | 99.76% | 100% | CRI74278.1     |
| 55† - | 38706 | 39251 | 181 | 20.435 | 6.23  | putative terminase small subunit                     | [ <i>Salmonella</i> phage SETP3]           | 2e-129      | 98.34% | 100% | YP_001110829.1 |
| 56† - | 39335 | 39436 | 33  | 3.705  | 10.08 | hypothetical protein                                 | [ <i>Citrobacter</i> virus Stevie]         | 7e-09       | 63.64% | 100% | YP_009148759.1 |
| 57† - | 39433 | 39615 | 60  | 6.858  | 8.68  | hypothetical protein                                 | [ <i>Salmonella</i> phage SE2]             | 2e-34       | 100%   | 100% | YP_005098124.1 |
| 58† - | 39612 | 39914 | 100 | 12.181 | 9.67  | putative membrane protein                            | [ <i>Salmonella</i> phage vB_SenS_PVP-SE2] | 6e-42       | 79.12% | 91%  | AST15499.1     |
| 59† - | 39914 | 40138 | 74  | 8.578  | 9.27  | putative NinH-like protein                           | [ <i>Salmonella</i> phage Ent1]            | 2e-46       | 97.30% | 100% | YP_007010509.1 |
| 60† - | 40281 | 40511 | 76  | 8.855  | 6.58  | putative NinZ-like protein                           | [ <i>Salmonella</i> phage SETP3]           | 2e-24       | 86.54% | 68%  | YP_001110826.1 |
| 61† - | 40504 | 40689 | 61  | 7.316  | 6.59  | hypothetical protein                                 | [ <i>Salmonella</i> phage vB_SpuS_Sp4]     | 4e-38       | 100%   | 100% | AWY03002.1     |
| 62† - | 40686 | 40841 | 51  | 5.798  | 10.01 | DUF2737 domain-containing protein                    | [ <i>Salmonella</i> phage vB_SenS_phi135]  | 1e-274e-157 | 94.12% | 100% | AYP69714.1     |
| 63† - | 40838 | 40996 | 52  | 6.060  | 3.90  | hypothetical protein                                 | [ <i>Salmonella</i> phage vB_SpuS_Sp4]     | 4e-27       | 98.08% | 97%  | AWY03004.1     |
| 64† - | 40993 | 41178 | 61  | 6.893  | 8.17  | hypothetical protein                                 | [ <i>Salmonella</i> phage SS3e]            | 1e-37       | 100%   | 100% | YP_224044.1    |
| 65† - | 41362 | 41850 | 162 | 17.341 | 9.66  | lysine                                               | [ <i>Salmonella</i> phage vB_SpuS_Sp4]     | 2e-112      | 97.53% | 100% | AWY03006.1     |
| 66† - | 41828 | 42118 | 96  | 10.693 | 9.98  | putative holin, class II                             | [ <i>Salmonella</i> phage vB_SenS-Ent2]    | 8e-62       | 97.89% | 98%  | YP_009009974.1 |
| 67† - | 42120 | 42401 | 93  | 10.321 | 7.85  | putative holin                                       | [ <i>Salmonella</i> phage Jersey]          | 2e-59       | 94.62% | 100% | YP_008239771.1 |
| 68† - | 42480 | 42914 | 144 | 15.397 | 4.46  | hypothetical protein                                 | [ <i>Salmonella enterica</i> ]             | 6e-97       | 95.83% | 100% | WP_129416902.1 |
| 69† - | 42920 | 43129 | 69  | 8.098  | 10.53 | hypothetical protein                                 | [ <i>Salmonella</i> phage BPS11Q3]         | 3e-44       | 100%   | 100% | YP_009322831.1 |

<sup>a</sup> †, AUG start codons; ‡, UUG start codons; §, GUG start codons. +, right orientation; -, left orientation.
